# Supplementary material for: Estimating the Prevalence of Treated Epilepsy Using Administrative Health Data and Its Validity: ESSENCE Study
Source: PubMed Central journal article supplement — J Clin Neurol. 2016 Jun 1;12(4):434–40. doi: 10.3988/jcn.2016.12.4.434 (PMC5063869; doi:10.3988/jcn.2016.12.4.434), 2016-06-01
Supplement: jcn-12-434-s001.pdf [file jcn-12-434-s001.pdf]

**Supplementary Table 1.** Prevalence of epilepsy according to age and sex (per 1,000)

| <b>Age, years</b> | <b>Males (95% CI)</b> | <b>Females (95% CI)</b> | <b>Total (95% CI)</b> |
|-------------------|-----------------------|-------------------------|-----------------------|
| 1-4               | 4.26 (4.20-4.32)      | 5.76 (5.69-5.84)        | 4.99 (4.95-5.08)      |
| 5-9               | 4.77 (4.73-4.81)      | 5.78 (5.73-5.83)        | 5.26 (5.21-5.30)      |
| 10-14             | 4.22 (4.19-4.25)      | 4.12 (4.08-4.15)        | 4.17 (4.14-4.20)      |
| 15-19             | 3.99 (3.97-4.00)      | 3.47 (3.44-3.51)        | 3.74 (3.72-3.77)      |
| 20-29             | 3.88 (3.86-3.91)      | 3.65 (3.62-3.67)        | 3.77 (3.75-3.79)      |
| 30-39             | 3.84 (3.82-3.86)      | 3.19 (3.17-3.22)        | 3.52 (3.50-3.55)      |
| 40-49             | 4.07 (4.04-4.09)      | 3.12 (3.10-3.15)        | 3.60 (3.58-3.63)      |
| 50-59             | 4.40 (4.37-4.44)      | 2.79 (2.76-2.82)        | 3.60 (3.56-3.63)      |
| 60-69             | 4.17 (4.12-4.21)      | 3.20 (3.16-3.25)        | 3.66 (3.61-3.70)      |
| ≥70               | 5.93 (5.85-6.01)      | 2.90 (2.85-2.94)        | 4.05 (3.99-4.10)      |
| ≥65               | 5.45 (5.39-5.51)      | 3.07 (3.03-3.10)        | 4.01 (3.98-4.04)      |
| Total             | 4.20 (4.17-4.23)      | 3.47 (3.44-3.51)        | 3.84 (3.81-3.87)      |

CI: confidence interval.
